# Supplementary material for: Establishment of human induced trophoblast stem cells via reprogramming of fibroblasts
Source: Springer Nature journal article supplement (doi:10.1038/s41596-022-00742-2), 2022-10-14
Supplement: MOESM1 [file 41596_2022_742_MOESM1_ESM16.pdf]

---

## Supplementary information

---

# Establishment of human induced trophoblast stem cells via reprogramming of fibroblasts

---

In the format provided by the  
authors and unedited

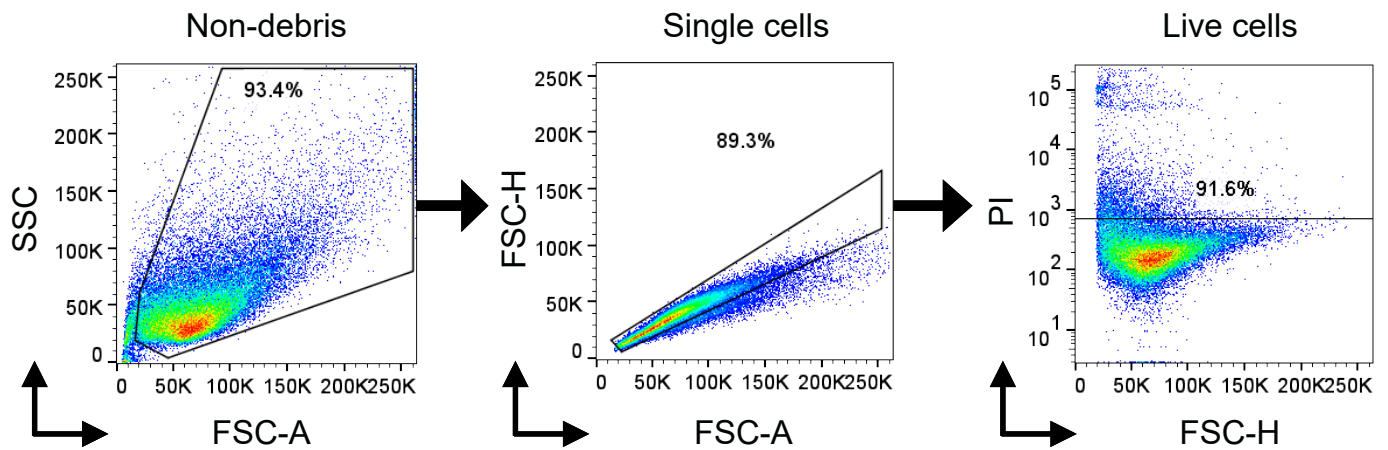

**Supplementary Fig. 1 | Flow cytometry gating strategy for live cells.** For the gating strategy to select for live cells, first gate for non-debris cells (SSC vs FSC-Area(A)) and select for single cells FSC-Height (H) vs FSC-A as shown in the above figure. Finally, select for propidium iodide (PI)-negative cells which represent the live cell populations. Subsequent flow cytometry analysis on respective markers are examined on the gated live cell populations.
